# Supplementary material for: AMPylation matches BiP activity to client protein load in the endoplasmic reticulum
Source: eLife journal article supplement (doi:10.7554/elife.12621), 2015-12-17

# Figure 4-supplement 3

## A

mkfpmvaaaIIllcavraEEEDKKEDVGTVVGIDLGTTYSCVGVFKNGRVEIIANDQGNRITPSYVAFTEGERLIGDAAKNQLTSN  
PENTVFDKRLIGRTWNDPSVQQDIKFLPFKVVEKTKPYIQVDIGGGQTKTFAPEEISAMVLTMMKETAEAYLGKKVTHAV  
VTVPAYFNDARQATKDAGTIAGLNMVRIINEPTAAAIAYGLDKREGEKNILVFDLGGGTFDVSLLTIDNGVFEVVATNGDTHL  
GGEDFDQRMMEHFIKLYKKKTGKDVRKDNRAVQKLRRREVEKAKRALSSQHQAIEIESFFEGEDFSETLTRAKFEELNMDL  
FRSTMKPVQKVLEDSDLKKSIDEIVLVGGSTRIPKIQQLVKEFFNGKEPSRGINPDEAVYGAAGVAGVLSGDQDTGDLVLL  
DVCPLTLGIETVGGVMTKLIPRNTVVP TKKSQIFSTASDNQPTVTIKVYEGERPLTKDNHLLGTFDLTGIPPAPRGVPQIEVTFE  
IDVNGILRVTAEDKGTGNKNKITITNDQNRLTPEEIERMVNDAEKFAEEDKKLKERIDTRNELESYAYSLKNQIGDKEKLGK  
LSSEDKETMEKAVEEKIEWLESHQDADIEDFKAKKKKELEEIVQPIISKLYGSAGPPPTGEEDTSEKDEL

— Trypsin  
— Chymotrypsin  
— Asp-N  
— Arg-C  
— SubA site

## B

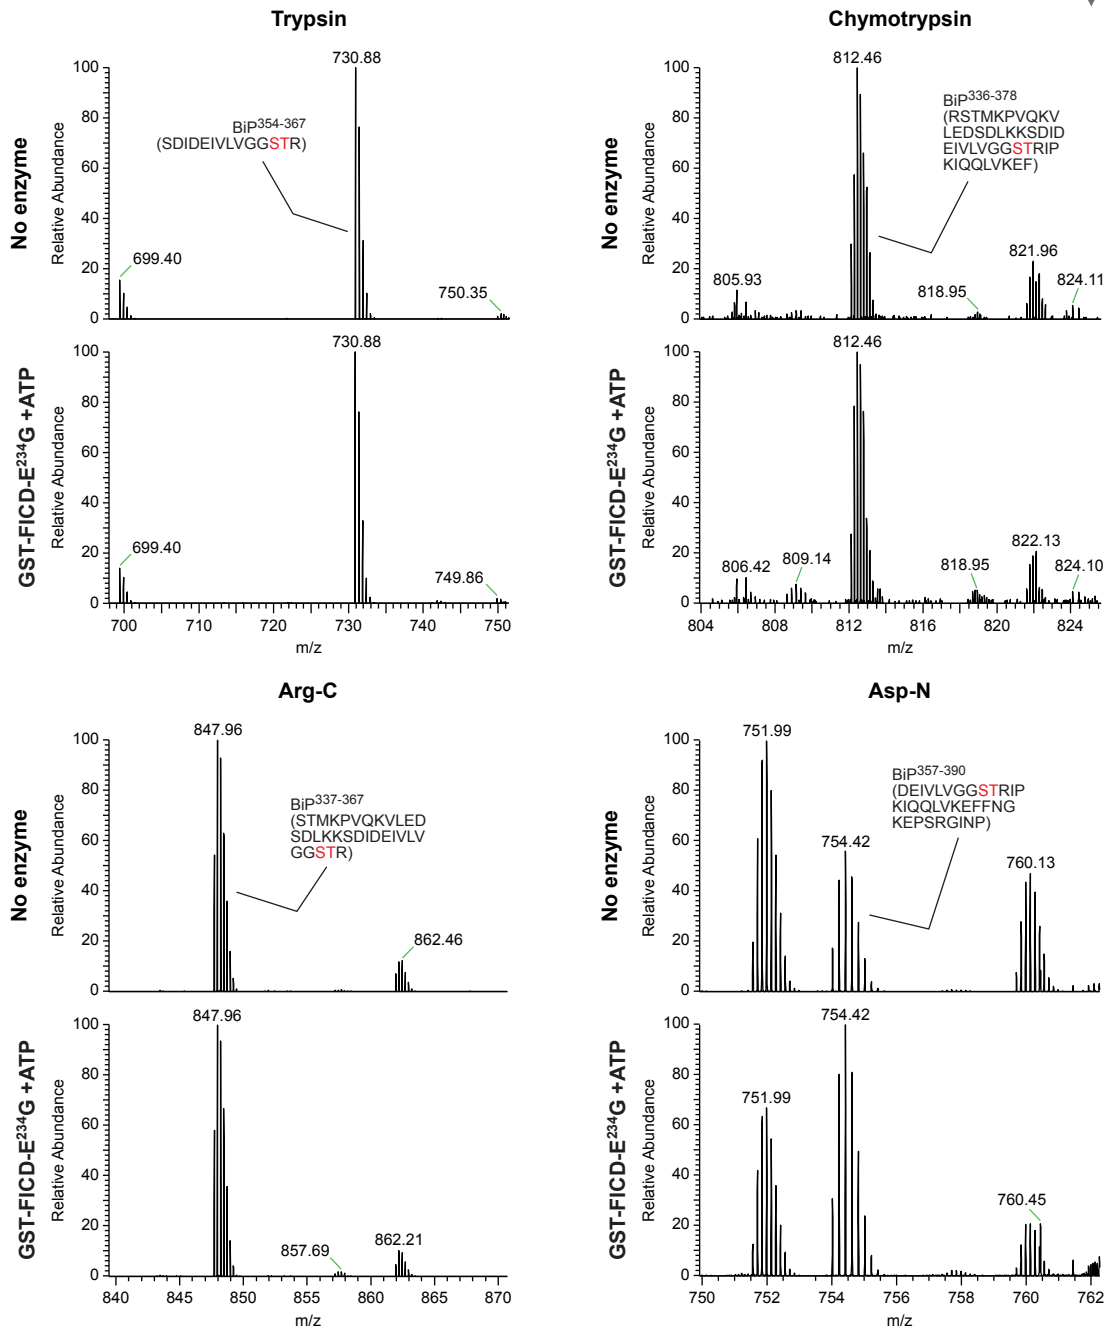

Supplement: supp [file elife-12621-supp-v1.zip]
