# Supplementary material for: AMPylation matches BiP activity to client protein load in the endoplasmic reticulum
Source: eLife. 2015 Dec 17;4:e12621. doi: 10.7554/eLife.12621 (PMC4739761; doi:10.7554/eLife.12621)
Supplement: Supplementary File 1. — DOI: http://dx.doi.org/10.7554/eLife.12621.029 [file elife-12621-supp1.xlsx]

## Sheet: Sheet1
ID	Plasmid name	Description	Reference	First appearance	Label in figure
UK173	haBiP_27-654_pQE10	Bacterial expression of His6-tagged wildtype hamster BiP	PMID: 18923430	Figure 2	wt
UK175	haBiP_27-654_E201G_pQE10	Bacterial expression of His6-tagged E201G mutant hamster BiP (PMID: 8463260)	PMID: 18923430	Figure 7A	E201G
UK179	haBiP_27-654_R492E_pQE10	Bacterial expression of His6-tagged R492E mutant hamster BiP	PMID: 22869598	Figure 5C	R492E
UK182	haBiP_27-654_V461F_pQE10	Bacterial expression of His6-tagged substrate binding-deficient V461F mutant hamster BiP	PMID: 18923430	Figure 5C	V461F
UK185	mP58(384-470)_pGEX-4T1	Bacterial expression of GST-TEV-tagged J domain (384-470) of ERdj6	PMID: 18923430	Figure 8C	J
UK186	mP58(384-470)H422Q_pGEX-4T	Bacterial expression of GST-TEV-tagged J domain (384-470) of ERdj6 carrying a mutation (H422Q) in the HPD motif	PMID: 18923430	Figure 8C	J*
UK417	haBIP_27-654_R470E_PQE10	Bacterial expression of His6-tagged E470E mutant hamster BiP	PMID: 22869598	Figure 5C	R470E
UK838	haBiP_27-654_T229A_pQE10	Bacterial expression of His6-tagged T229A hamster BiP mutant (PMID: 8463260)	PMID: 26473973	Figure 3-figure supplement 1	T229A
UK857	haBiP_417-654_pCA528	Bacterial expression of Smt3-tagged SBD of BiP (417-654)	This study	Figure 7-figure supplement 1	Smt3-SBD
UK859	haBiP_19-654_pCA528	Bacterial expression of His6-Smt3-tagged hamster BiP; Ulp1 cleavage yields mature hamster BiP 19-654	PMID: 26473973	Figure 3B
UK984	haBiP_27-654_ADDA_V2_pQE10	Bacterial expression of His6-tagged linker mutant hamster BiP	PMID: 26473973	Figure 7A	ADDA
UK1359	pSpCas9(BB)-2A-GFP	Mammalian expression of Cas9 from S. pyogenes with 2A-EGFP and cloning backbone for sgRNA	PMID: 24157548
UK1397	hsHYPE_WT_pCEFL-mCherry	Mammalian expression of full-length human FICD (HYPE) in pCEFL marked with mCherry	This study	Figure 9A	FICD
UK1398	hsHYPE_E234G_pCEFL-mCherry	Mammalian expression of full-length human FICD (HYPE) with activating E234G mutation in pCEFL marked with mCherry	This study	Figure 9A	FICD-E234G
UK1415	hsHYPE_15-548_E234G_pEBG	Mammalian expression of N-term GST-tagged FICD (15-548) with hyperactivating E234G mutation	This study	Figure 3D	GST-FICD-E234G
UK1440	hsHYPE_E234G_pCDNA5/FRT/TO	Mammalian expression of human FICD (HYPE) with activating E234G in pCDNA5/FRT/TO (Invitrogen)	This study
UK1443	hsHYPE_E234G_H363A_pCEFL_mCherry	H363A mutation in plasmid 1398	This study	Figure 9A	FICD-E234G-H363A
UK1446	hsHYPE_E234G_H363A_pCDNA5/FRT/TO	Mammalian expression of human FICD (HYPE) with E234G and H363A mutations in pCDNA5/FRT/TO (Invitrogen)	This study
UK1448	haFICD_g1_pSpCas9(BB)-2A-GFP	GFP-tagged CRISPR (1359) for targeting hamster FICD gene (sgRNA sequence including PAM: GCCCTGGAGATGAAGCGTCAAGG)	This study
UK1449	haFICD_g2_pSpCas9(BB)-2A-GFP	GFP-tagged CRISPR (1359) for targeting hamster FICD gene (sgRNA sequence including PAM: GATGAAGCGTCAAGGTAAGAGGG)	This study
UK1450	haFICD_g3_pSpCas9(BB)-2A-GFP	GFP-tagged CRISPR (1359) for targeting hamster FICD gene (sgRNA sequence including PAM: GTAGATGCACTCAATGAGTTCGG)	This study
UK1470	haBiP-T366A_27-654_pQE10	Bacterial expression of His6-tagged T366A mutant hamster BiP (PMID: 25395623)	This study	Figure 5C	T366A
UK1479	FICD_45-458_E234G_pGV67	Bacterial expression of hyperactive GST-TEV-FICD-E234G (45-458)	This study	Figure 3A	GST-FICD-E234G
UK1480	FICD_45-458_E234G_H363A_pGV67	Bacterial expression N-terminally GST-tagged H363A mutant of GST-TEV-FICD (45-458)	This study	Figure 3A	FICD-E234G-H363A
UK1503	ratFICD_g1_pSpCas9(BB)-2A-GFP	GFP-tagged CRISPR (1359) for targeting rat FICD gene (sgRNA sequence including PAM: GGCTTGGTTTAGTGCGGCCTTGG on the complementary strand)	This study
UK1504	ratFICD_g2_pSpCas9(BB)-2A-GFP	GFP-tagged CRISPR (1359) for targeting rat FICD gene (sgRNA sequence including PAM: AGATGAAGCGCCAAGGCAAGAGG)	This study
UK1520	haBiP-T518A_27-654_pQE10	Bacterial expression of His6-tagged T518A mutant hamster BiP	This study	Figure 5A	T518A
UK1523	haBiP-T518E_27-654_pQE10	Bacterial expression of His6-tagged T518E mutant hamster BiP	This study	Figure 5C	T518E
UK1564	mFICD_104-458_pSmt3_pET28b	Bacterial expression N-terminally H6-Smt3 tagged wildtype mouse FICD lumenal structured domain (L104-P458)	This study	Figure 10-figure supplement 1	mFICD
UK1567	haBiP-T37G_27-654_pQE10	Bacterial expression of His6-tagged T37G mutan hamster BiP which is locked in the ADP-bound conformation (PMID: 7592894)	PMID: 26473973	Figure 7A	T37G
UK1568	haBiP-G226D_27-654_pQE10	Bacterial expression of His6-tagged ATP binding-deficient G226D mutant hamster BiP (PMID: 7592894)	PMID: 26473973	Figure 7A	G226D
UK1618	haBiP_27-654_T525A_pQE10	Bacterial expression of His6-tagged T525A mutant hamster BiP	This study	Figure 5A	T525A
UK1619	haBiP_27-654_T527A_pQE10	Bacterial expression of His6-tagged T527E mutant hamster BiP	This study	Figure 5A	T527E
