# Supplementary figures and images for: AMPylation matches BiP activity to client protein load in the endoplasmic reticulum
Source: eLife journal article supplement (doi:10.7554/elife.12621), 2015-12-17

Figure 2-supplement 1

A

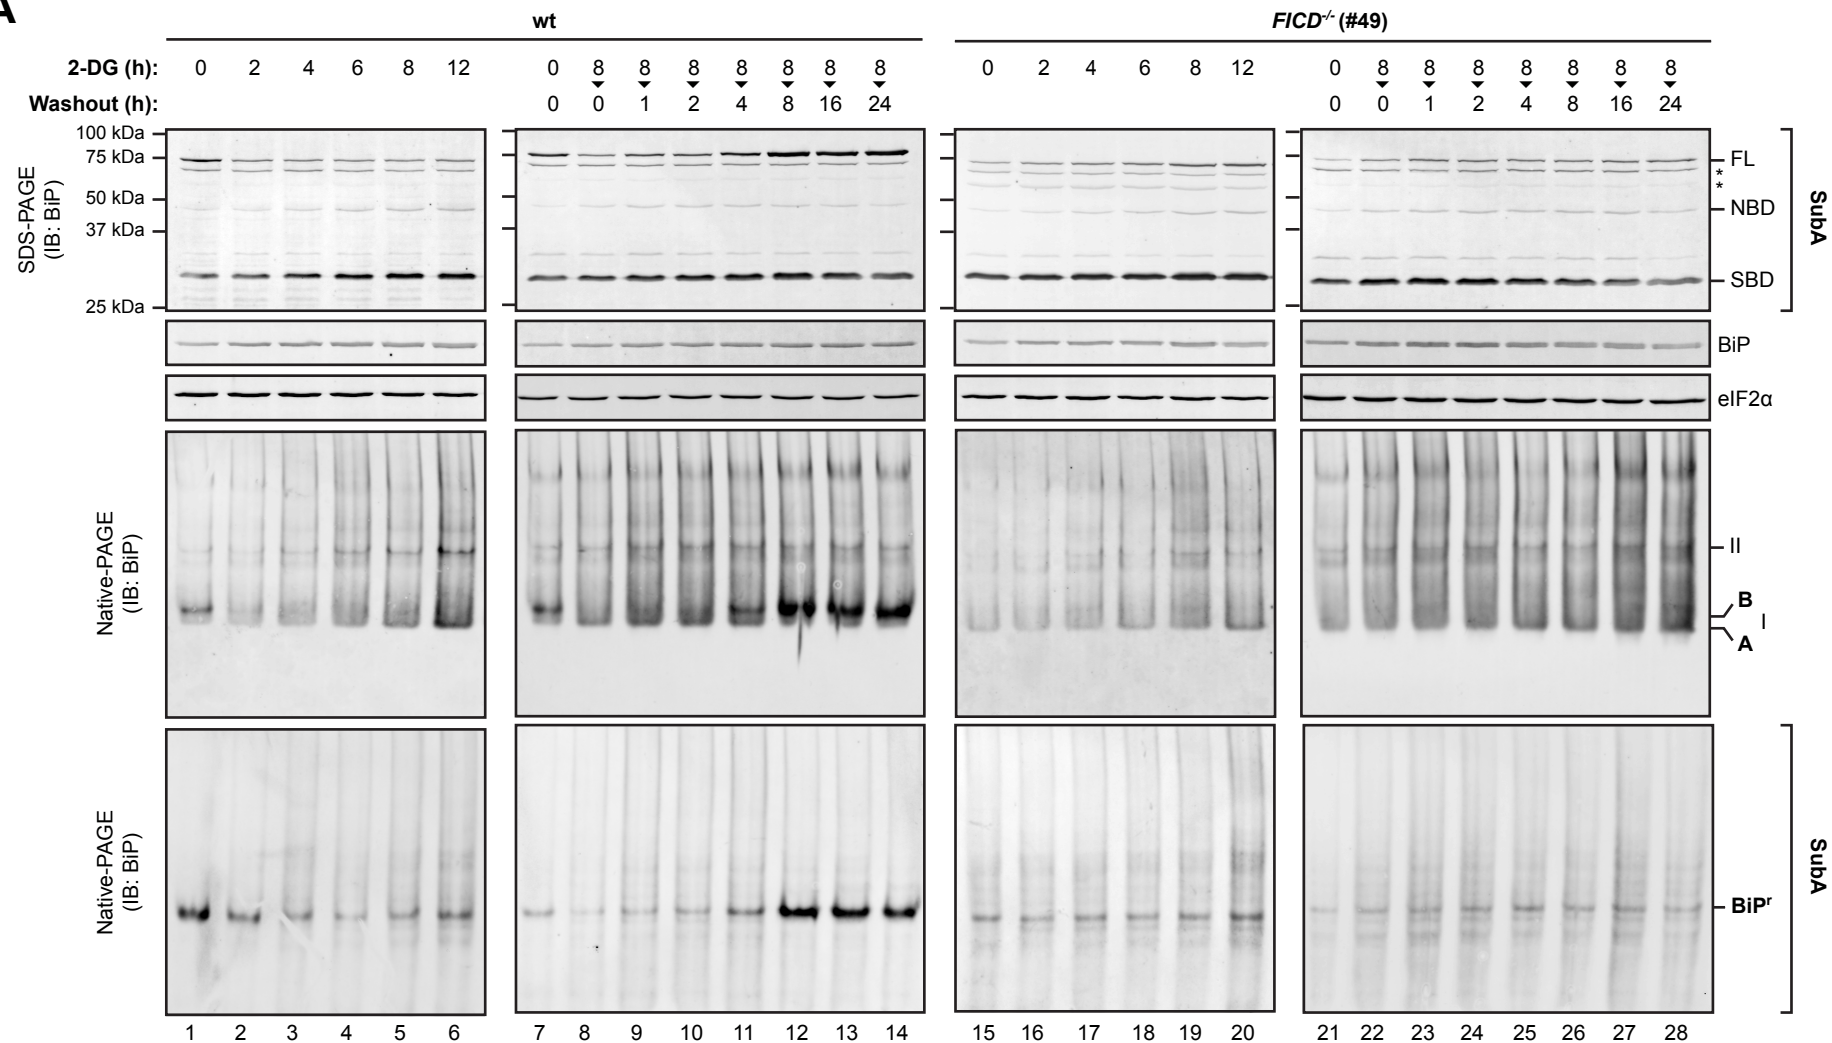

B

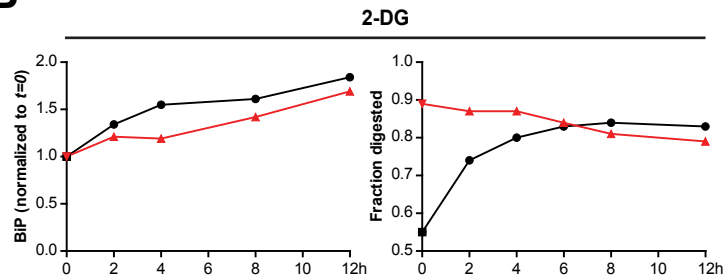

C

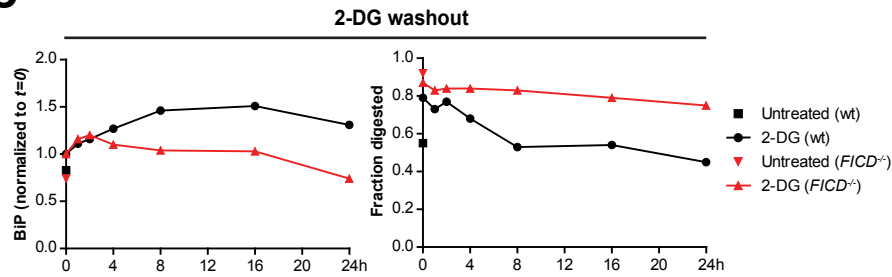

D

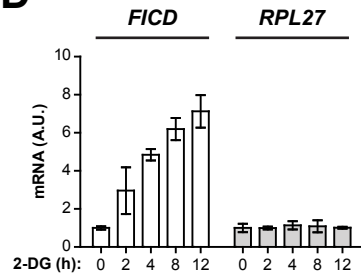

Supplement: supp [file elife-12621-supp-v1.zip]

Figure 7 - supplement 1

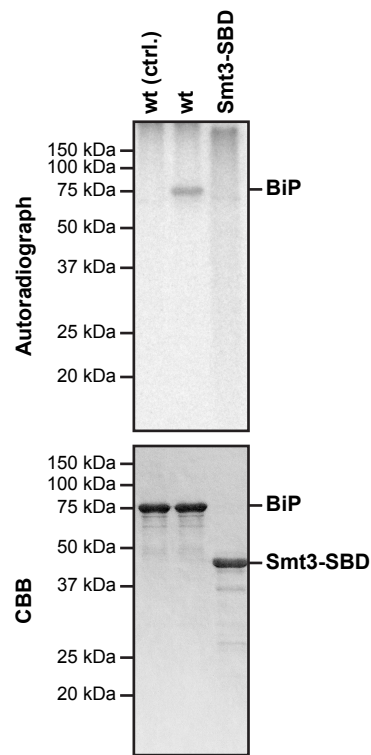

Supplement: supp [file elife-12621-supp-v1.zip]

Figure 4-supplement 1

A

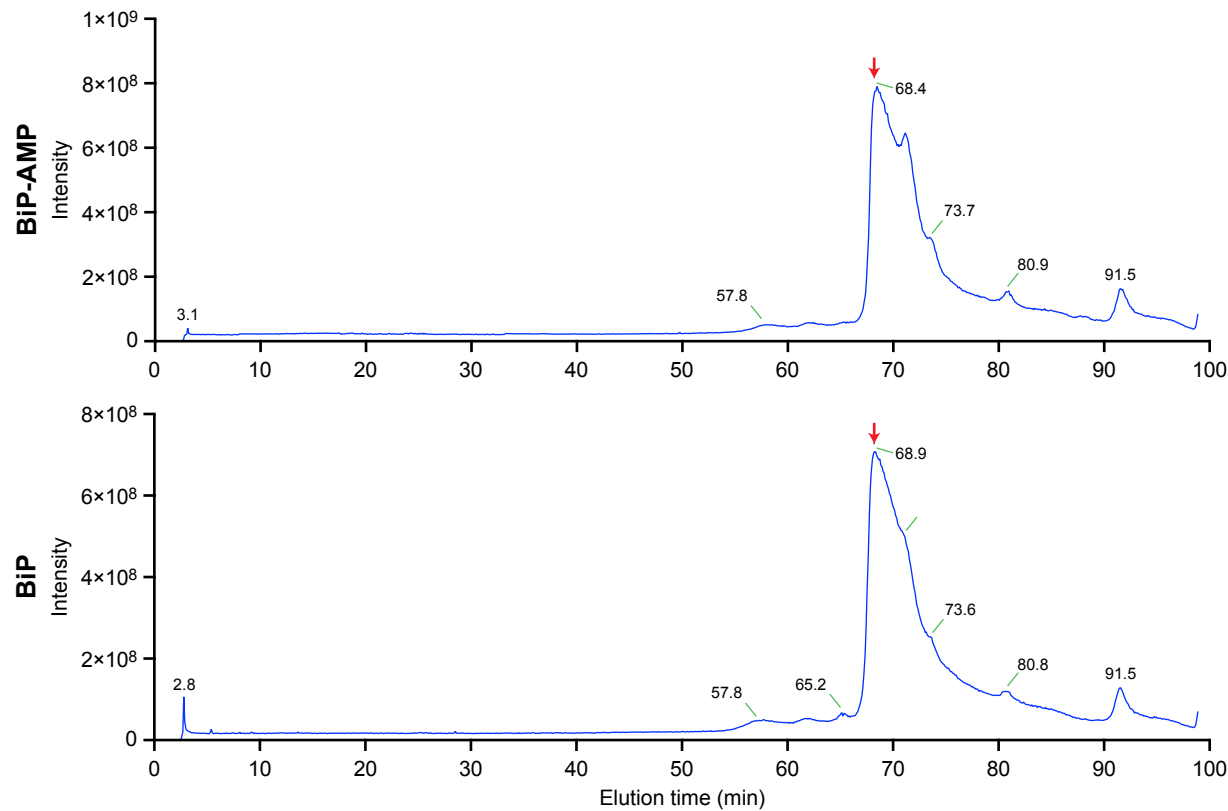

B

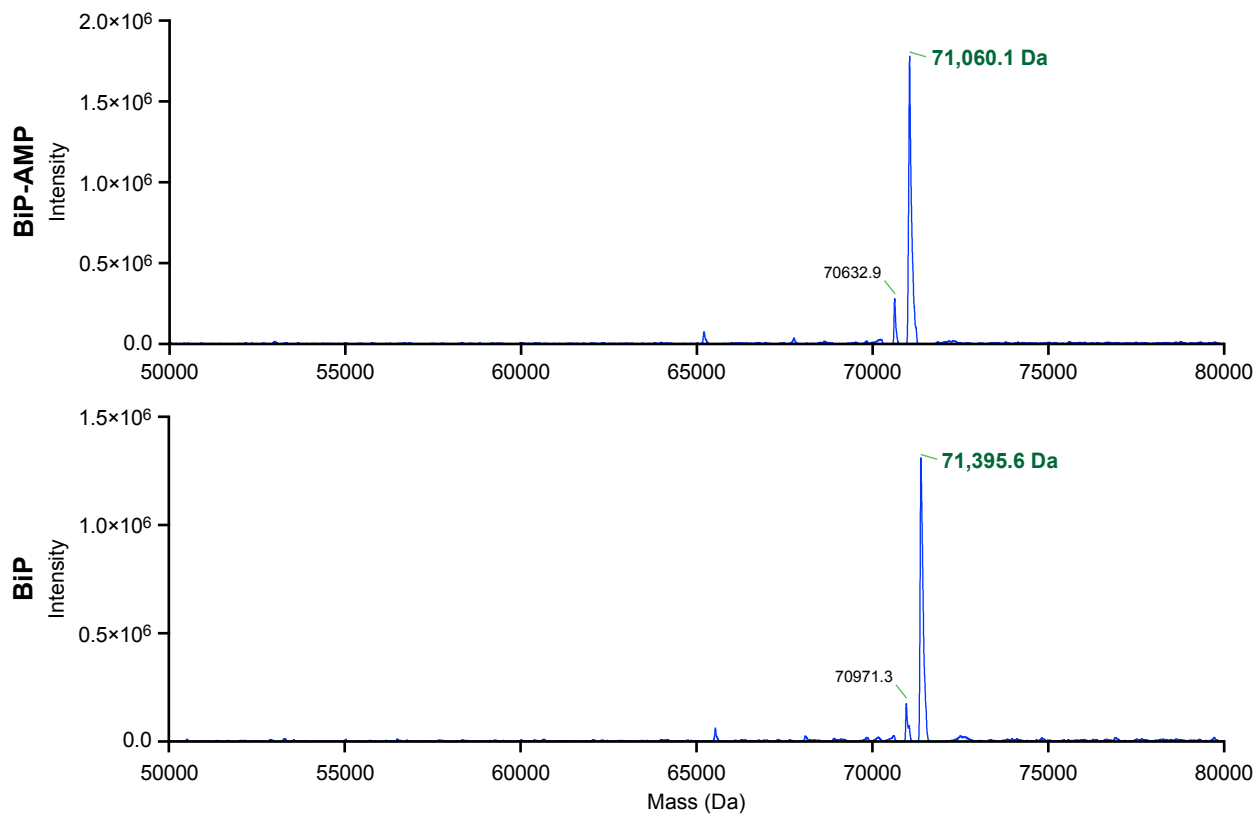

Supplement: supp [file elife-12621-supp-v1.zip]

**Figure 7 - supplement 2**

**Apo/ADP (PDB 5E86)**

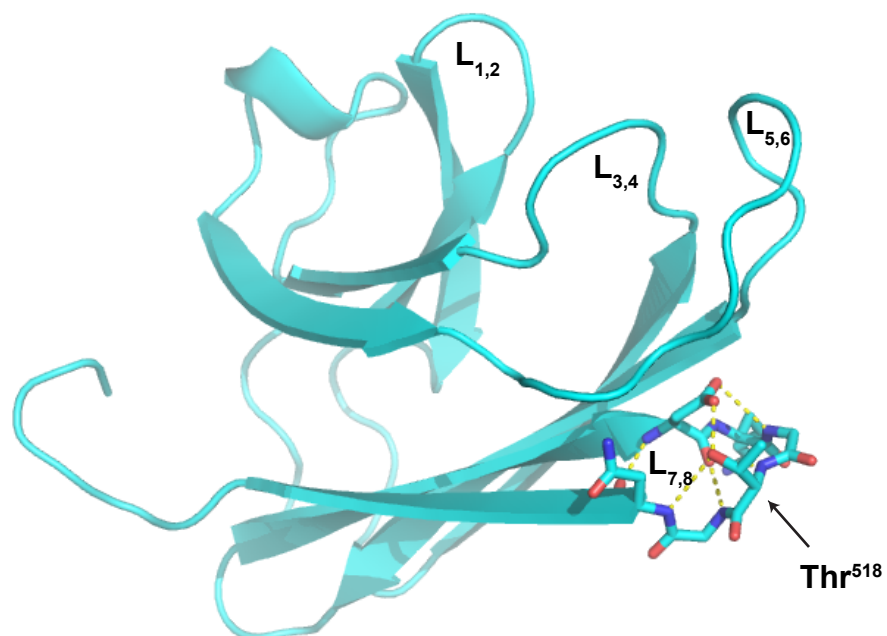

**ATP (PDB 5E84)**

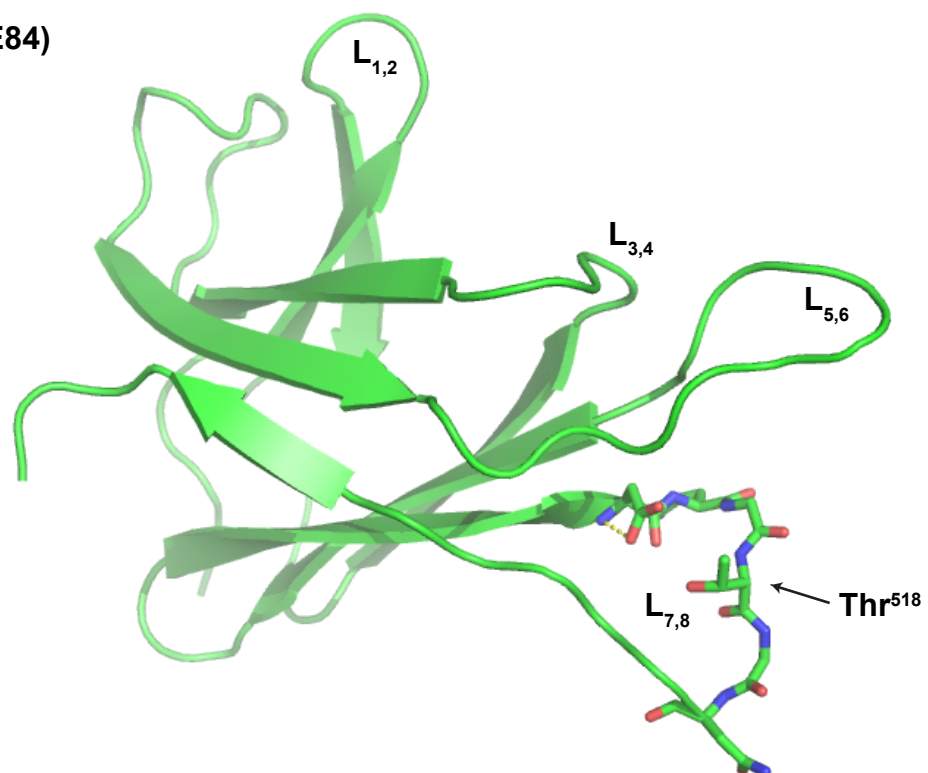

Supplement: supp [file elife-12621-supp-v1.zip]

Figure 10-supplement 2

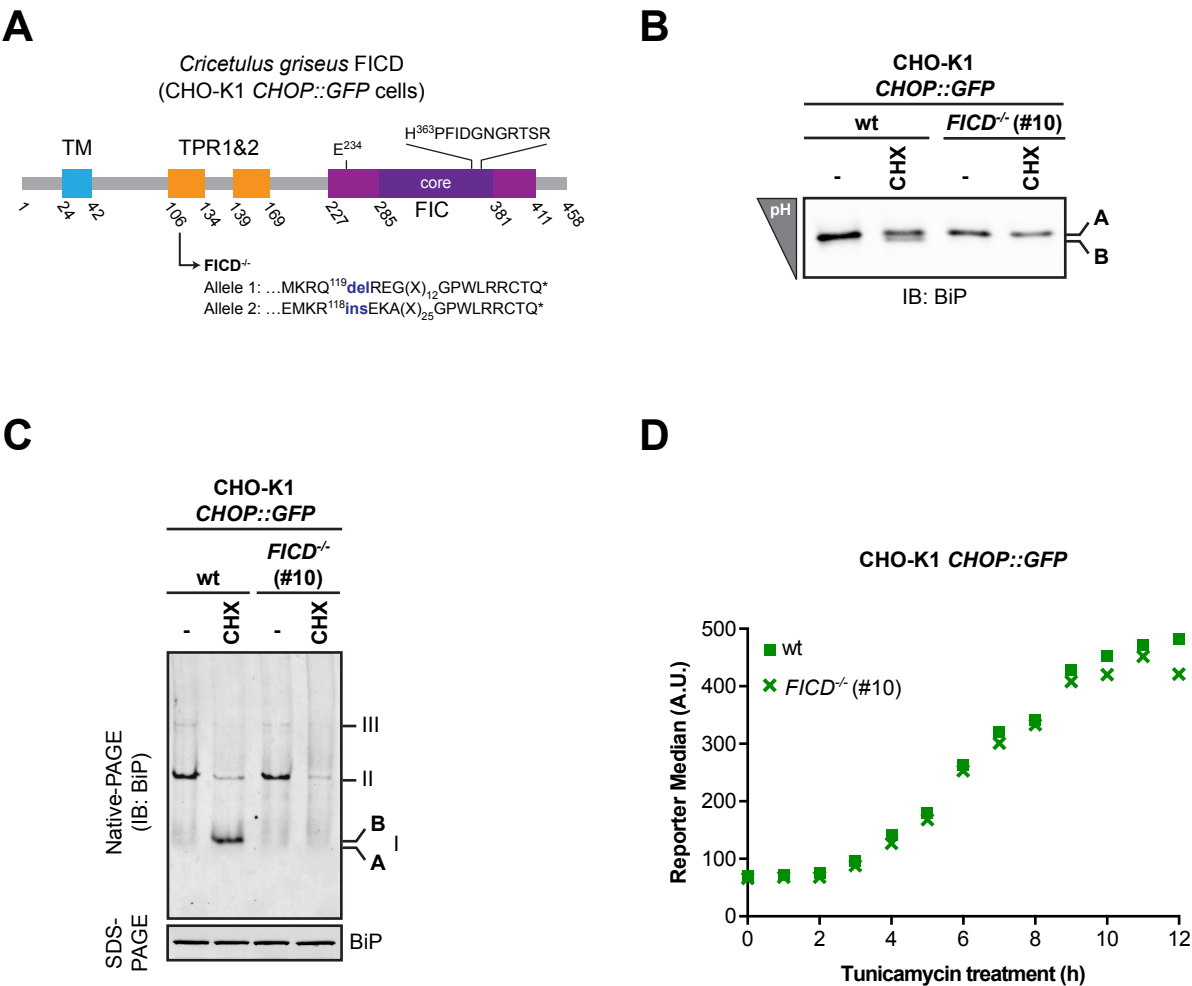

Supplement: supp [file elife-12621-supp-v1.zip]

Figure 6-supplement 1

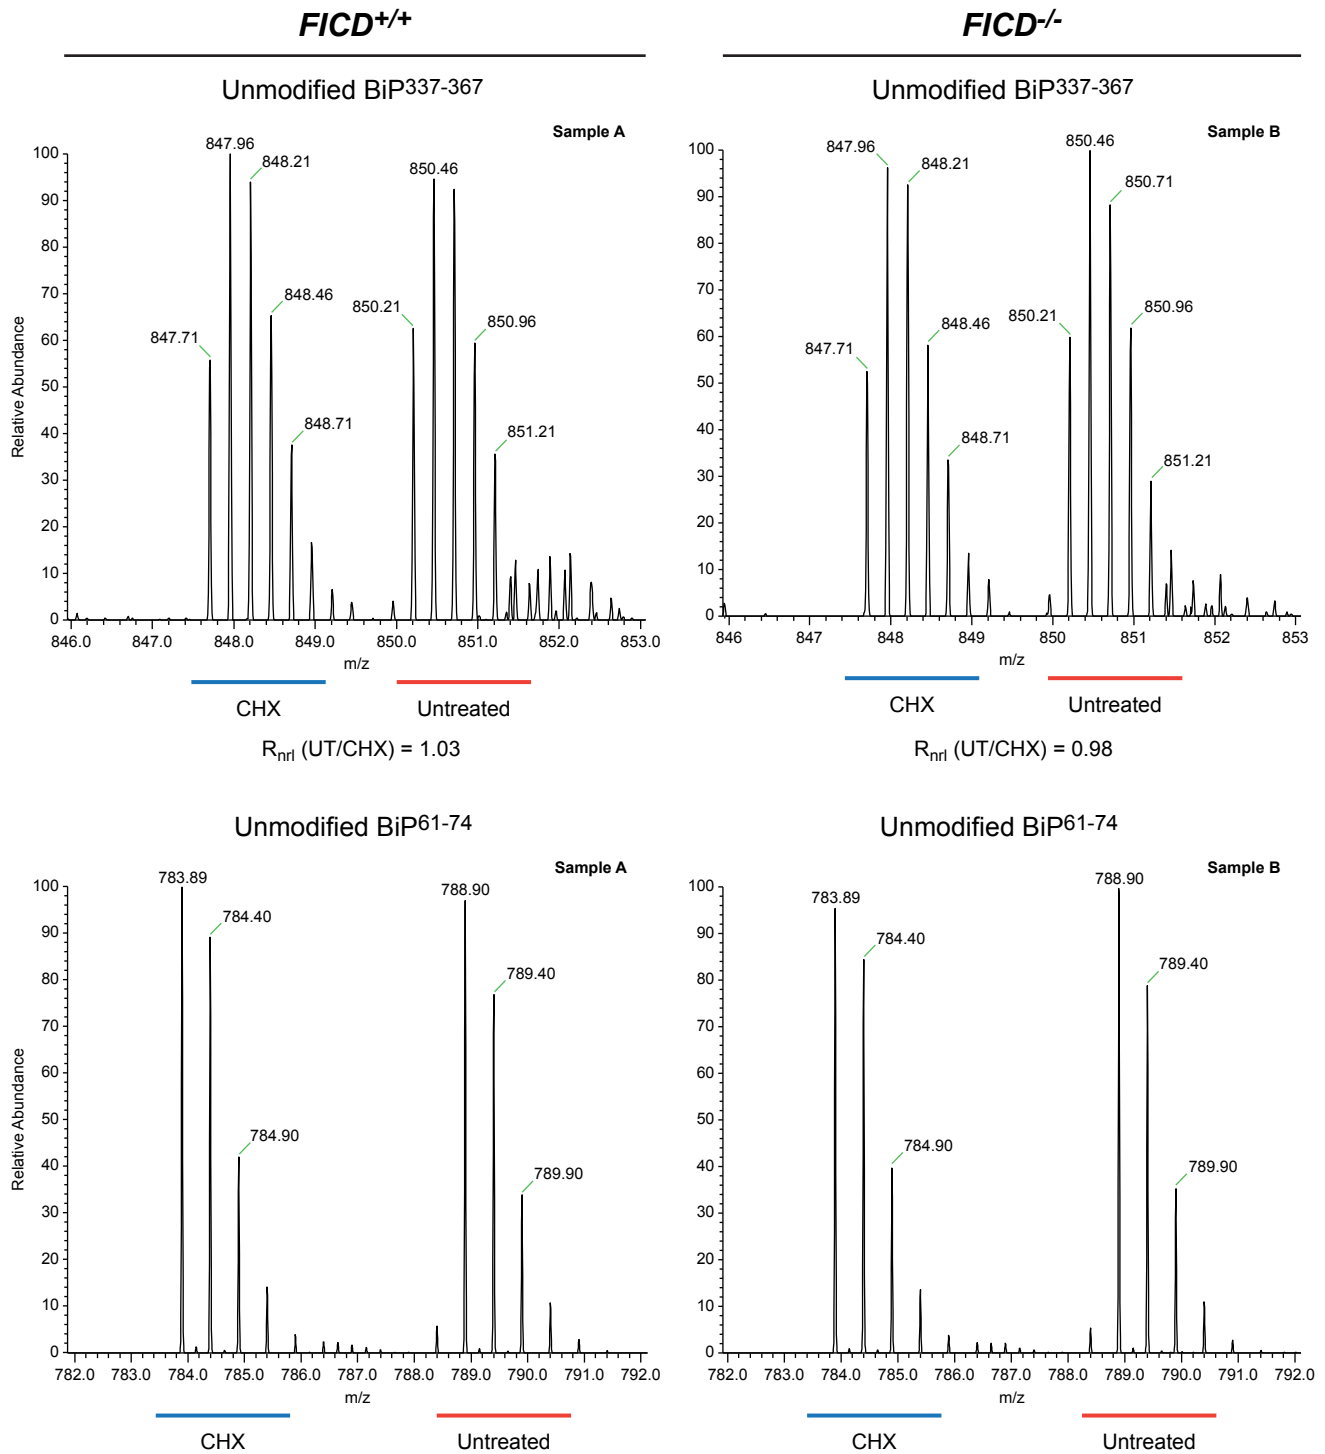

Supplement: supp [file elife-12621-supp-v1.zip]

# Figure 3-supplement 1

**A**

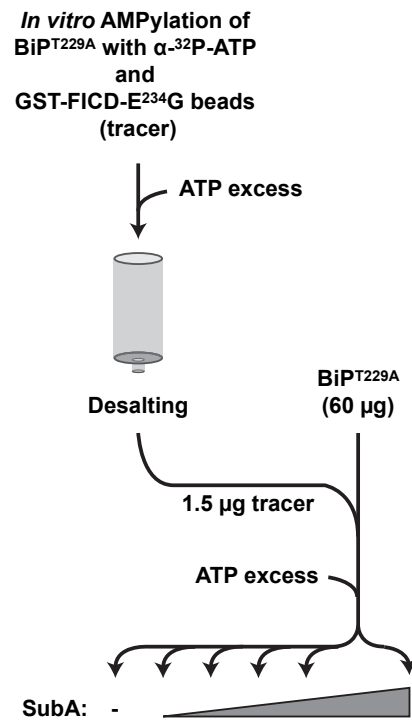

**B**

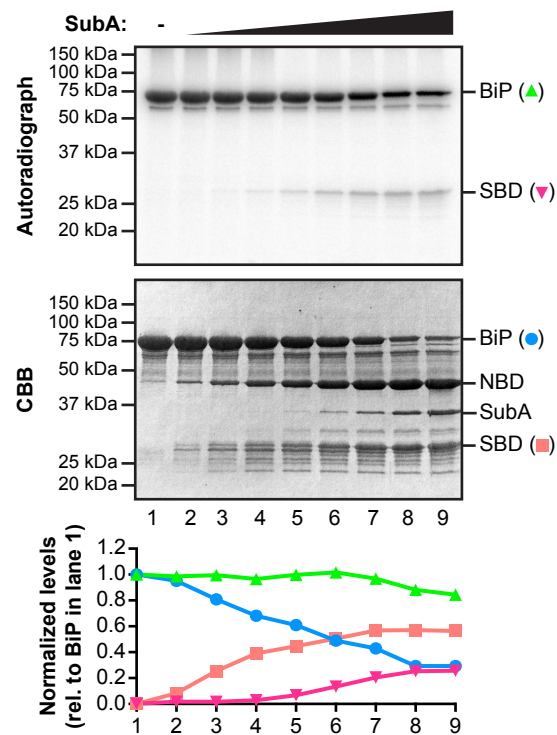

**C**

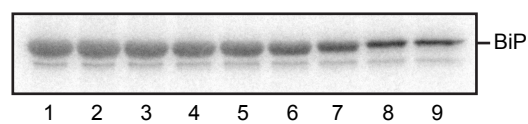

Supplement: supp [file elife-12621-supp-v1.zip]

Figure 9 - supplement 1

CHO-K1 *FICD*<sup>-/-</sup> *CHOP*::GFP (#10)

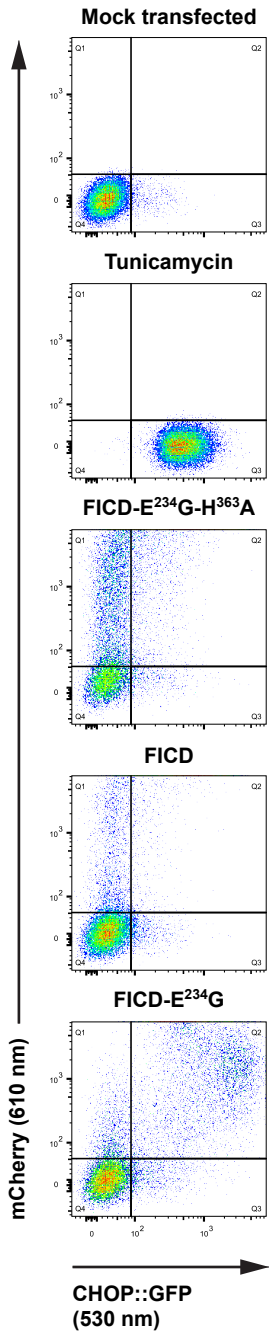

Supplement: supp [file elife-12621-supp-v1.zip]

Figure 4 - supplement 2

A

Wildtype

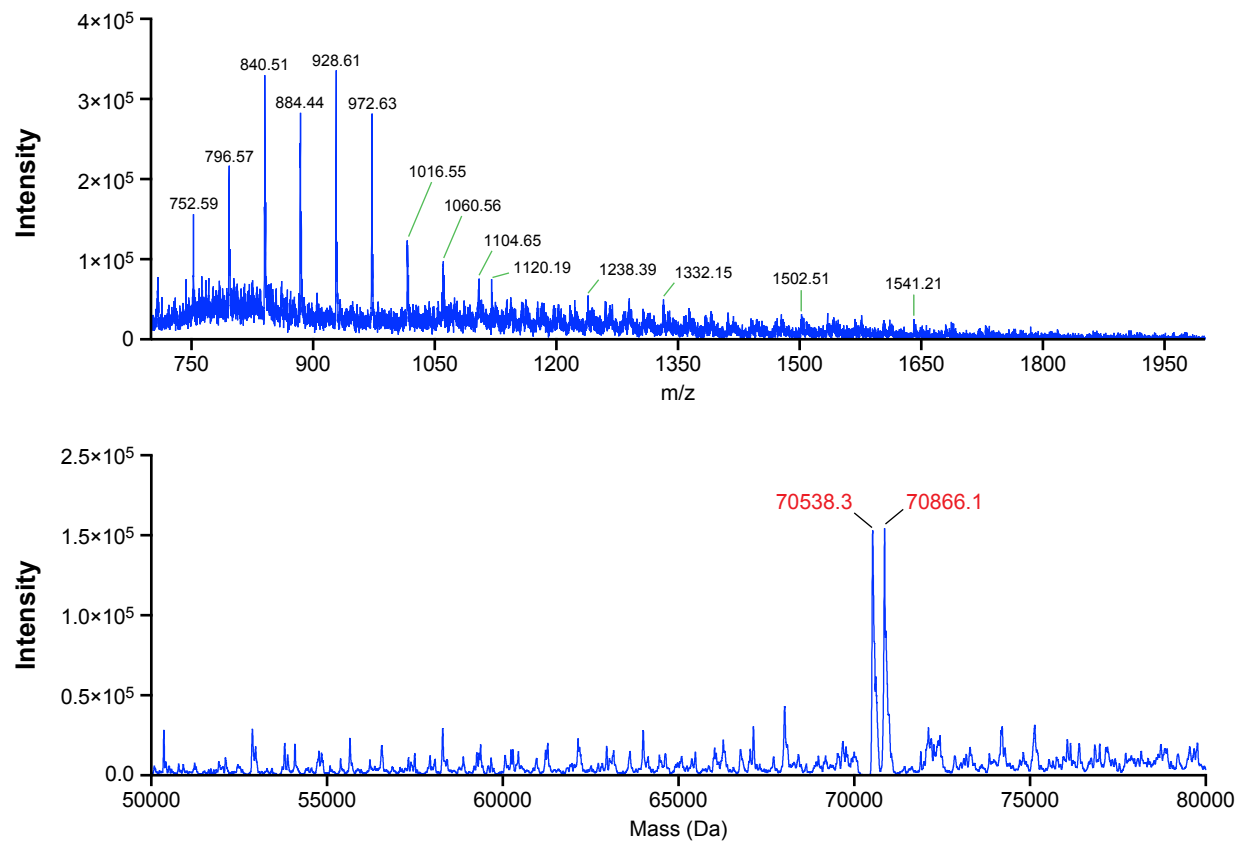

B

FICD<sup>-/-</sup>

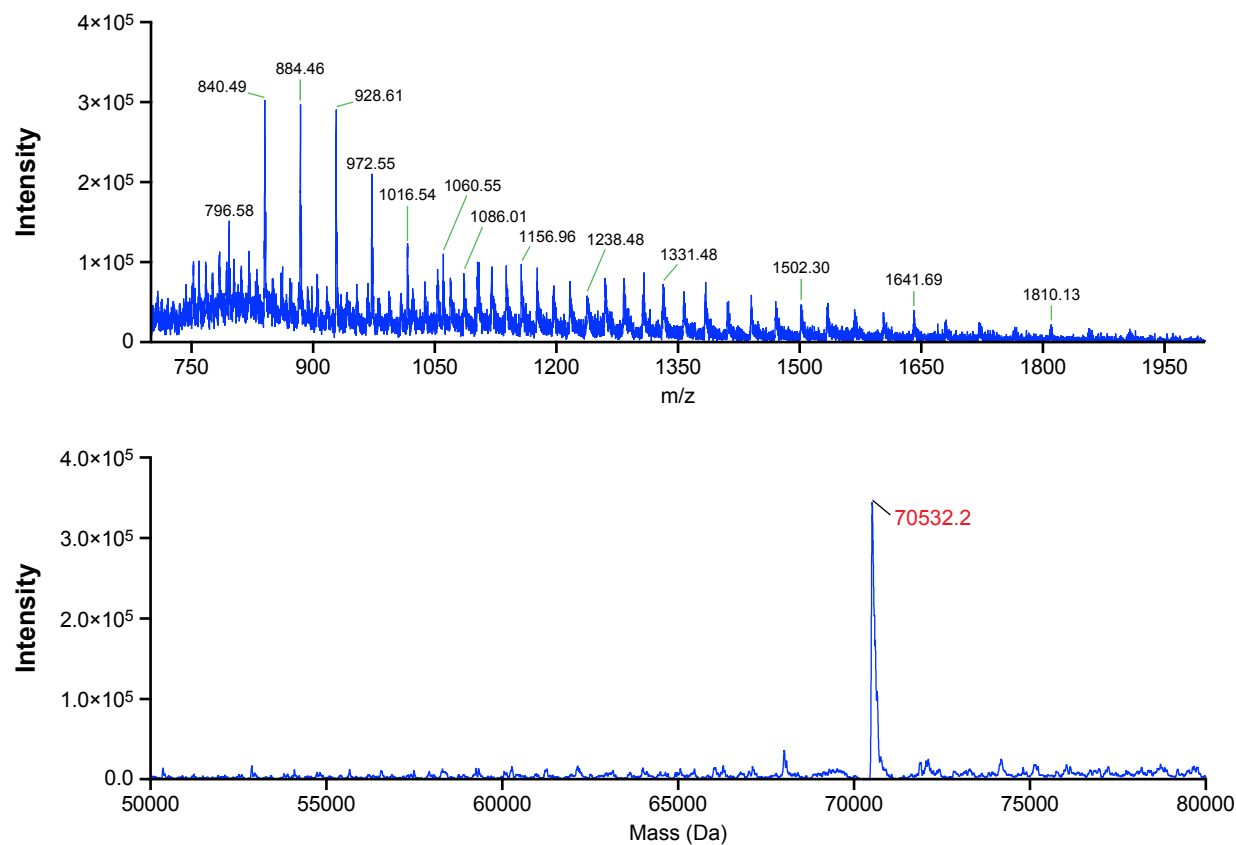

Supplement: supp [file elife-12621-supp-v1.zip]

Figure 6-supplement 2

A

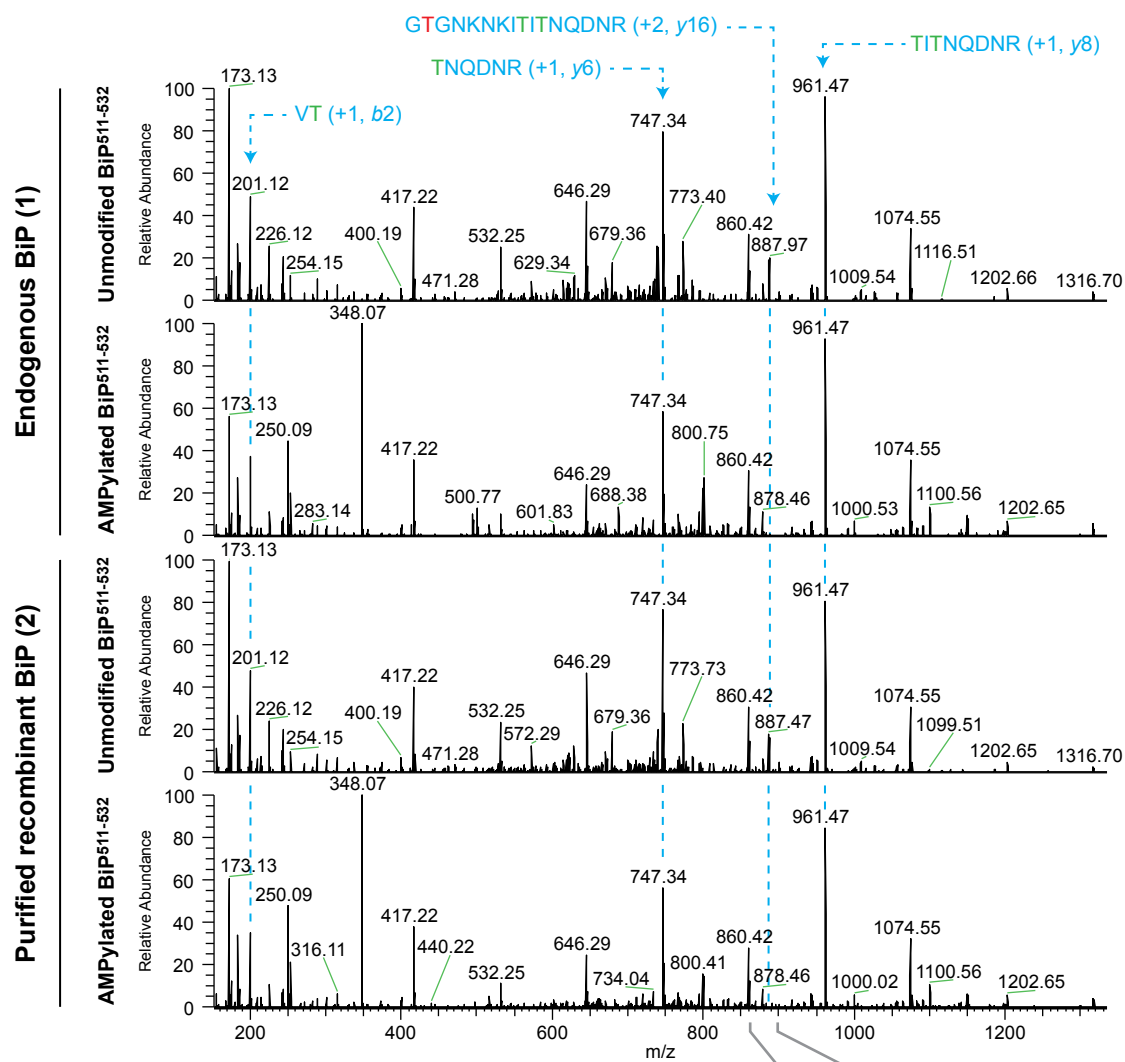

B

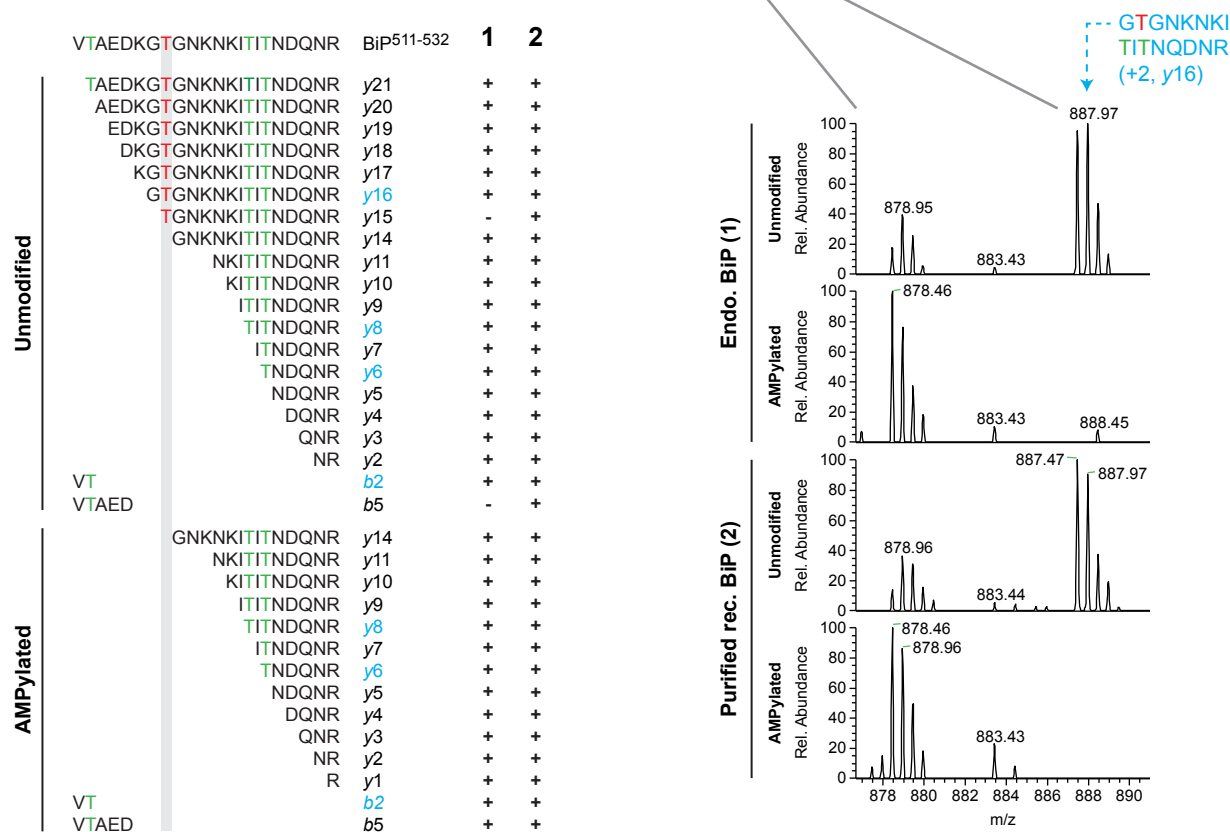

Supplement: supp [file elife-12621-supp-v1.zip]

## Figure 10-supplement 1

**A**

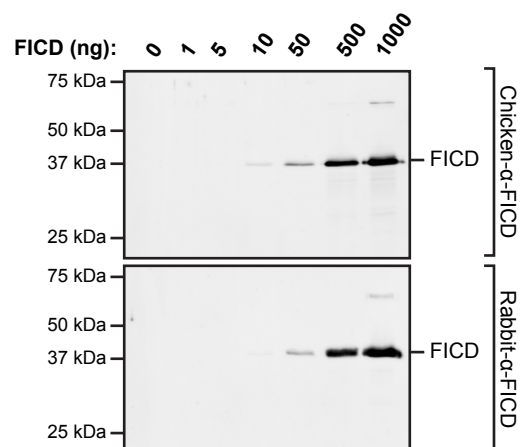

**B**

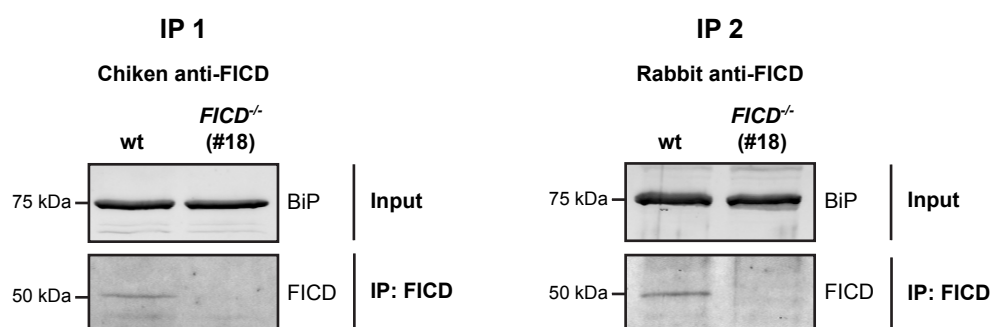

Supplement: supp [file elife-12621-supp-v1.zip]
